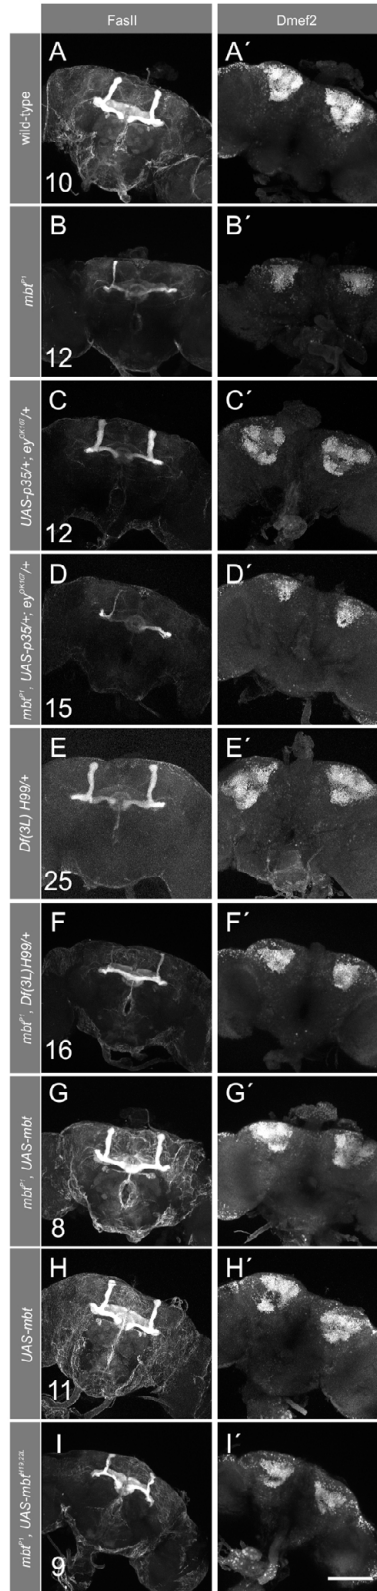

**Fig. S1. Analysis of the adult mushroom body phenotype.** Projections of confocal images of adult brains at the level of the lobe system (labeled with FasII) and the Kenyon cell layer (labeled with Dmef2) are shown. (A-B') The lobe system and the Kenyon cell cluster are both severely reduced in *mbt<sup>P1</sup>* brains compared with the wild type. Frequently,  $\alpha/\beta$ -lobes are completely missing. (C,C') Expression of *UAS-p35* in a wild-type background (using *ey<sup>OK107</sup>* that post-embryonically drives expression in Kenyon cells and not in MBNBs) does not interfere with the adult MB structure. (D,D') Expression of *UAS-p35* in *mbt<sup>P1</sup>* animals does not rescue the *mbt<sup>P1</sup>* phenotype. (E-F') *Df(3L)H99* does not change adult MB structure in the wild type. No rescue of MB size is observed with *Df(3L)H99* in *mbt<sup>P1</sup>* background. (G,G') Neuroblast-specific expression of an *mbt*-transgene in *mbt<sup>P1</sup>* background with *worniu-GAL4* rescues the MB size to wild-type level. (H,H') No influence on MB structure was observed upon expression of the *mbt* transgene in wild-type background. (I,I') Expression of *mbt<sup>H19,22L</sup>* resulted in partial rescue of MB size. The numbers of brains analyzed are indicated in the images. Scale bar: 100  $\mu$ m.
